# Supplementary material for: Z-Scheme photocatalytic solar-energy-to-hydrogen conversion driven by the HfS2/SiSe heterostructure
Source: Royal Society of Chemistry journal article supplement (doi:10.1039/d1tc05781b), 2022-01-01
Supplement: d1tc05781b1.pdf [file d1tc05781b1.pdf]

# Z-scheme photocatalytic solar-energy-to-hydrogen conversion driven by the HfS<sub>2</sub>/SiSe heterostructure

Chun-Fang Zhang, Chuan-Lu Yang<sup>\*</sup>, Mei-Shan Wang, and Xiao-Guang Ma

*School of Physics and Optoelectronic Engineering, Ludong University, Yantai 264025, China*

## 1. structural and electronic properties of HfS<sub>2</sub> and SiSe monolayer and HfS<sub>2</sub>/SiSe heterostructure

**Table S1** The lattice parameters and bandgaps of the HfS<sub>2</sub> and SiSe monolayers (primitive cell). The previously reported data are also included.

| configurations                          | $a$ (Å) | Bandgap (eV)             |
|-----------------------------------------|---------|--------------------------|
| HfS <sub>2</sub> (present)              | 3.62    | 2.01                     |
| HfS <sub>2</sub> <sup>1</sup>           | 3.64    | 1.12 <sup>*</sup>        |
| HfS <sub>2</sub> <sup>2</sup>           | 3.68    | 2.05                     |
| HfS <sub>2</sub> (H-phase) <sup>3</sup> | 3.54    | 1.95                     |
| HfS <sub>2</sub> <sup>4</sup>           | 3.53    | 1.72                     |
| HfS <sub>2</sub> <sup>5</sup>           | 3.61    | 1.99                     |
| SiSe(present)                           | 3.49    | 2.18 <sup>*</sup> , 2.96 |
| SiSe <sup>6</sup>                       | 3.52    | 2.12 <sup>*</sup>        |
| SiSe <sup>7</sup>                       | 3.55    | 3.03                     |

<sup>\*</sup> Results obtained using PBE calculations

---

<sup>\*</sup> Corresponding author. *E-mail address*: ycl@ldu.edu.cn. (C.L. Yang).

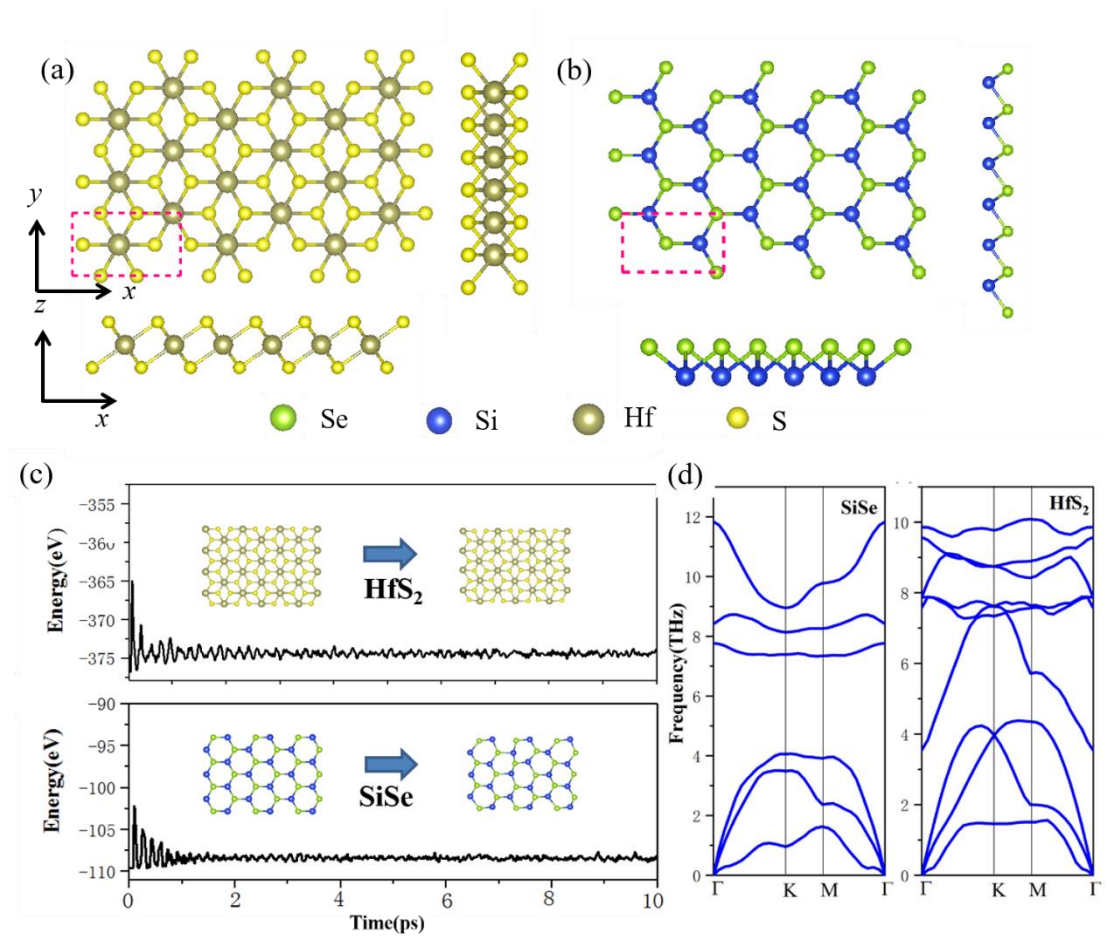

**Fig. S1.** (a)-(b) Top and side views of the HfS<sub>2</sub> monolayer and SiSe monolayers, (c) The results of the AIMD simulation within 10 picoseconds at 400 K. (d) Phonon dispersions.

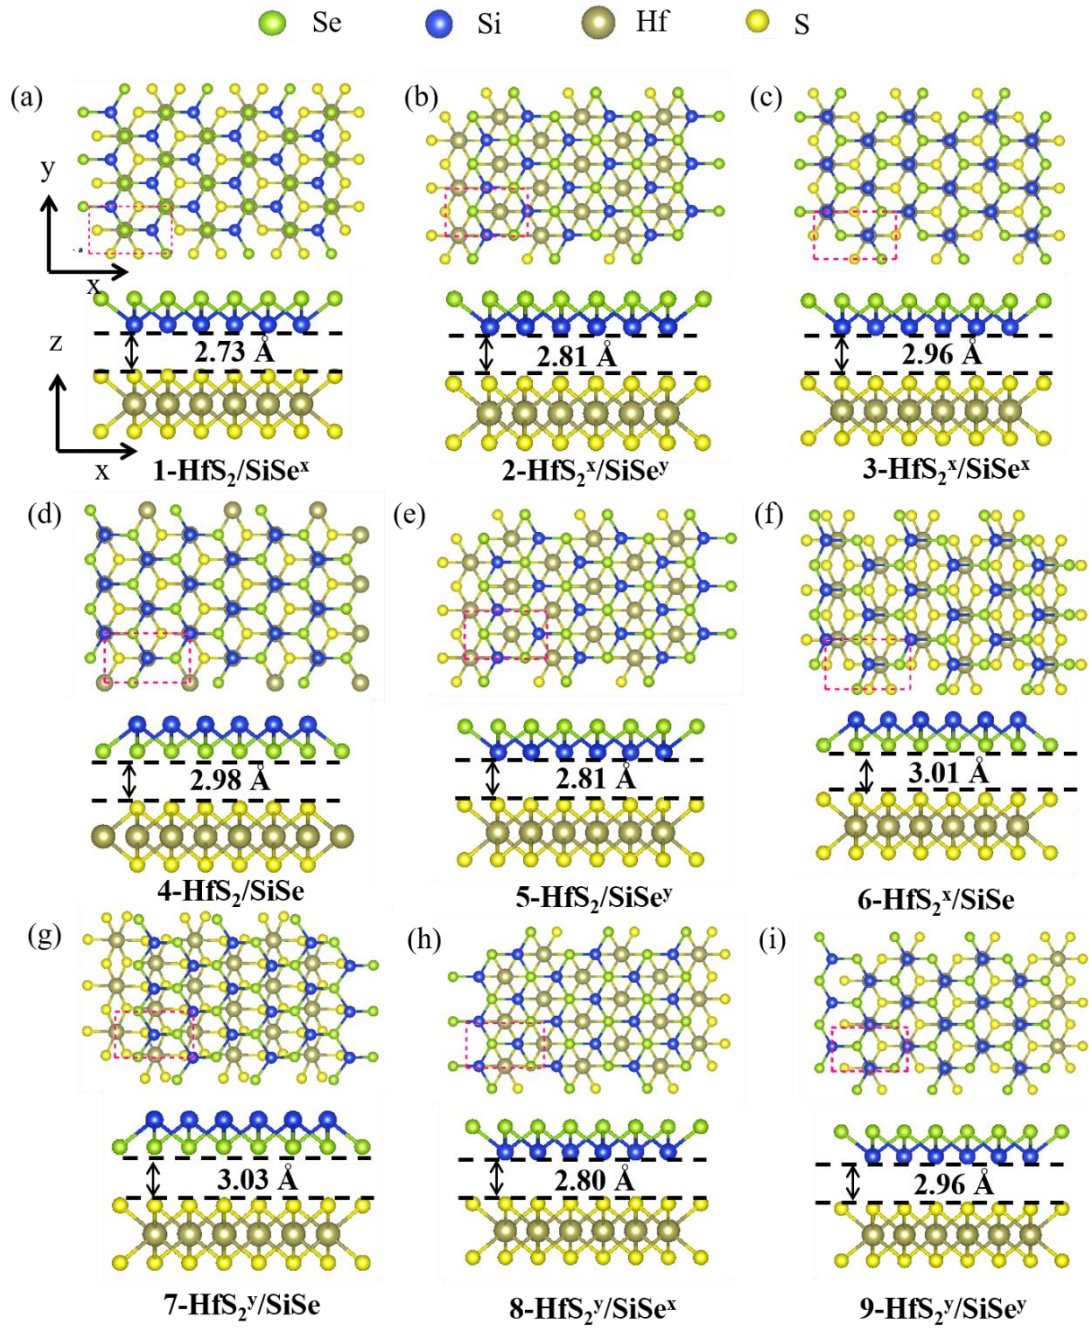

**Fig. S2.** The geometrical structures for all considered configurations of the  $\text{HfS}_2/\text{SiSe}$  heterostructure.

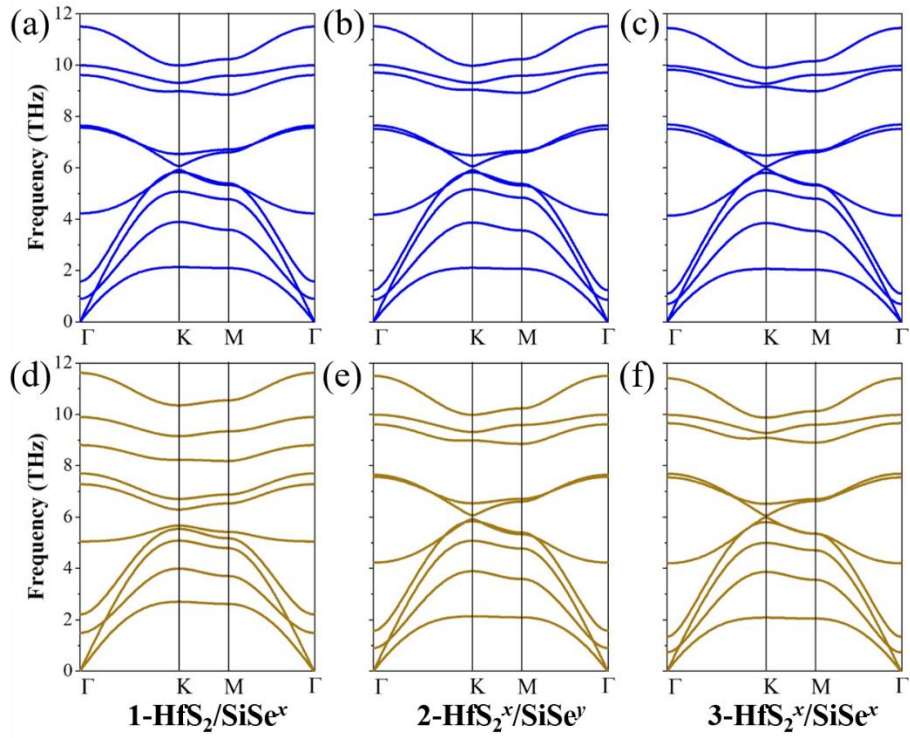

**Fig. S3.** The Phonon dispersion of three configurations. (a-c) phonon dispersion without considering a solvent effect, (c-d) phonon dispersion with solvent effect.

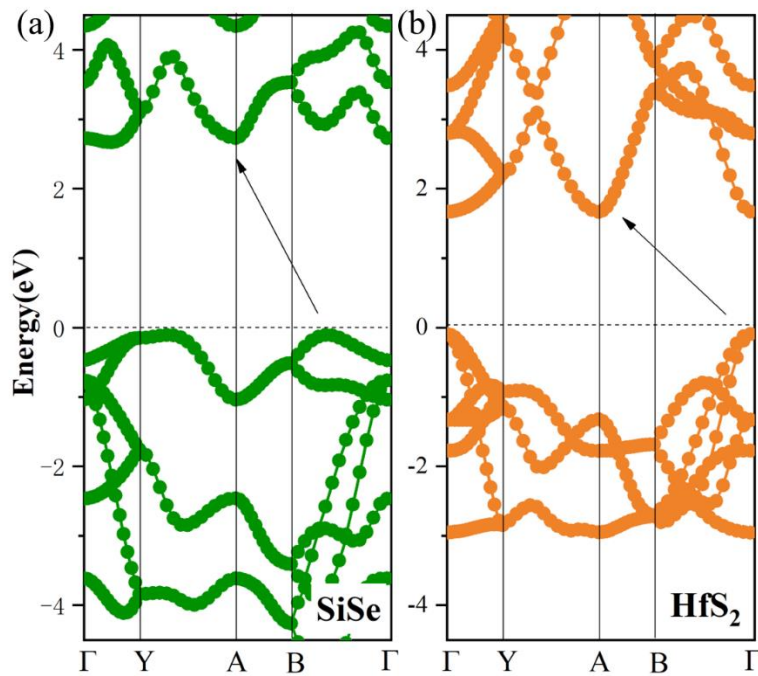

**Fig. S4.** Band energy structures of the separated HfS<sub>2</sub> and SiSe monolayers.

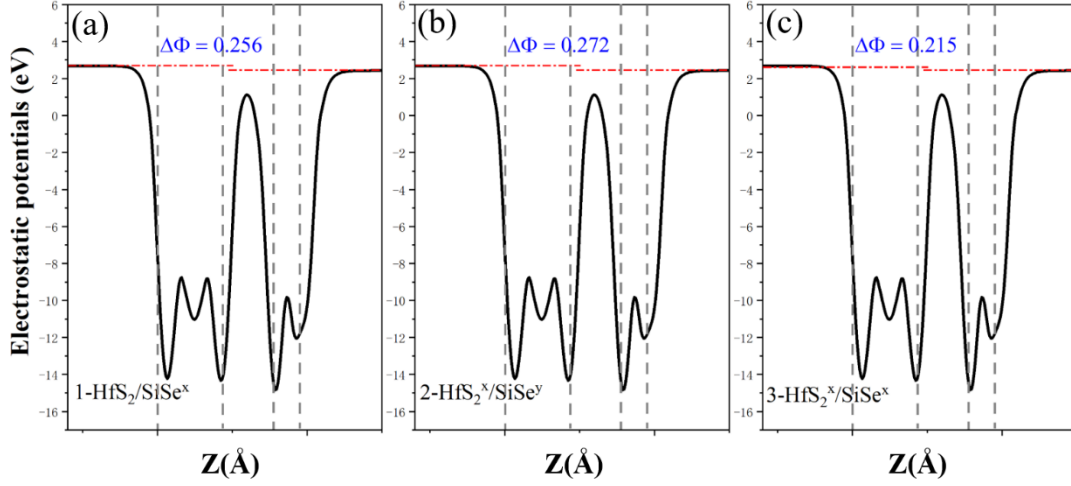

**Fig. S5.** The electrostatic potentials and the differences of the vacuum energy levels ( $\Delta\Phi$ ).

## 2. Calculation formula and details of current-carrying mobility

The formula can be obtained from the deformation potential theory:<sup>8</sup>

$$\mu = \frac{2e\hbar^3 C}{3K_B T m^{*2} E_d^2} \quad (6)$$

In the formula,  $C$  is the elastic modulus,  $E_d$  is DP constant,  $m^*$  is effective mass  $\hbar$  is Jowah Planck's constant,  $K_B$  is Boltzmann's constant,  $T$  for the temperature.

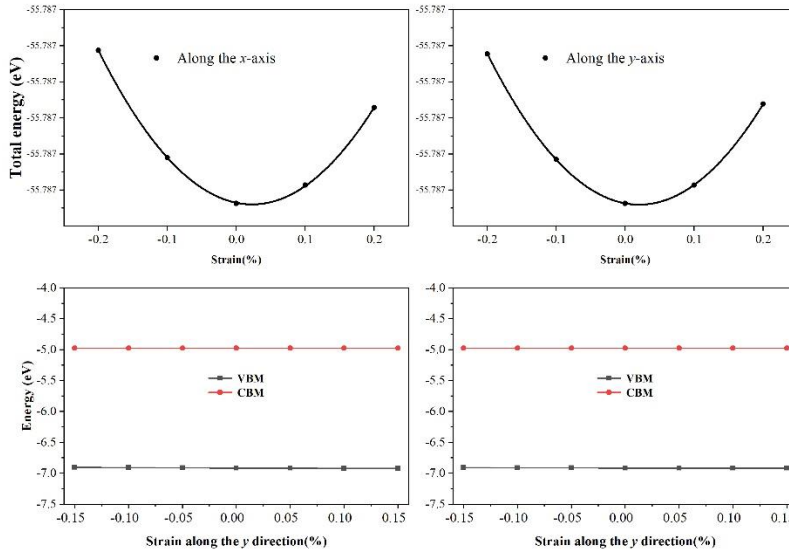

**Fig. S6.** (a-b) The curves for fitting the effective masses, and (c-d) The shifts of CBM/VBM for fitting the deformation potential constants for the HfS<sub>2</sub> monolayer.

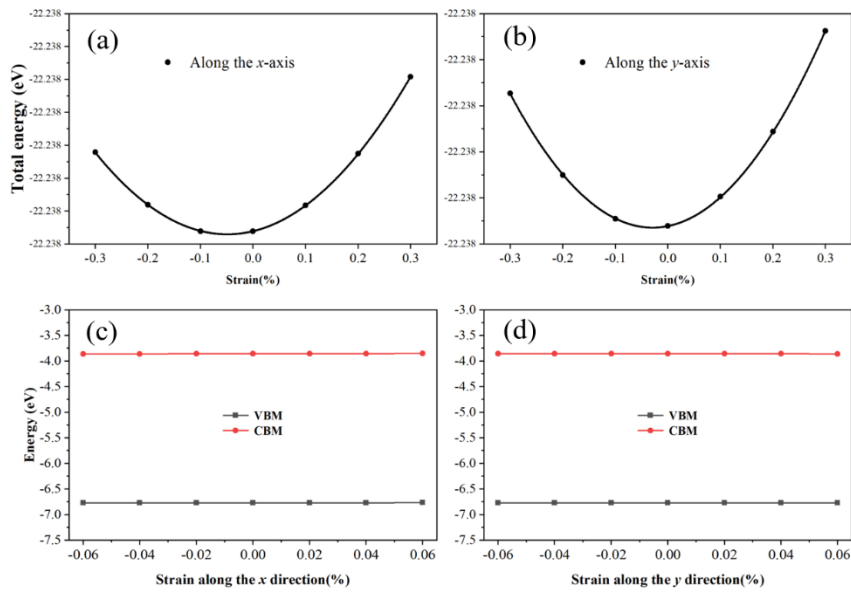

**Fig. S7.** (a-b)The curves for fitting the effective masses, and (c-d) The shifts of CBM/VBM for fitting the deformation potential constants for the SiSe monolayer.

**Table S2** The carrier mobilities of the HfS<sub>2</sub> and SiSe monolayers.

| configurations   | Carrier type | $m^*$<br>(/m <sub>0</sub> ) | $C_x$<br>(N/m) | $C_y$<br>(N/m) | $E_d^x$<br>(eV) | $E_d^y$<br>(eV) | $\mu_x$<br>(cm <sup>2</sup> / V.s ) | $\mu_y$<br>(cm <sup>2</sup> / V.s ) |                      |
|------------------|--------------|-----------------------------|----------------|----------------|-----------------|-----------------|-------------------------------------|-------------------------------------|----------------------|
| HfS <sub>2</sub> | tensile      | electron                    | 0.47           | 123.30         | 123.83          | 0.30            | 0.82                                | 8.81×10 <sup>4</sup>                | 1.12×10 <sup>4</sup> |
|                  |              | hole                        | 0.47           | 123.30         | 123.83          | 1.18            | 1.18                                | 5.69×10 <sup>3</sup>                | 5.72×10 <sup>3</sup> |
|                  | compressive  | electron                    | 0.47           | 123.30         | 123.83          | 0.30            | 0.82                                | 8.81×10 <sup>4</sup>                | 1.12×10 <sup>4</sup> |
|                  |              | hole                        | 0.47           | 123.30         | 123.83          | 6.35            | 6.87                                | 1.97×10 <sup>2</sup>                | 1.69×10 <sup>2</sup> |
| SiSe             | electron     | 0.70                        | 61.16          | 60.92          | 6.59            | 3.89            | 41.18                               | 2.09×10 <sup>3</sup>                |                      |
|                  | hole         | 1.54                        | 61.16          | 60.92          | 3.72            | 1.34            | 26.34                               | 1.22×10 <sup>3</sup>                |                      |

### 3. The details of the calculational method and results of solar-energy-to-hydrogen ( SETH ) conversion efficiency

According to the calculational methodology of SETH conversion efficiency ( $\eta_{SETH}$ ) proposed by Fu *et al.*,<sup>9</sup>  $P(h\omega)$  is the expression for the AM 1.5G solar energy flux by the photon energy  $h\omega$ , band gaps  $E_g$ (HSE) is the largest band gap between two monolayers. The energy conversion efficiency of light absorption is defined as  $\eta_{abs}$ , the efficiency of carrier utilization is defined as  $\eta_{cu}$ , SETH conversion efficiency is defined as  $\eta_{STH}$ , and corrected SETH efficiency of photocatalytic water splitting is defined as  $\eta$ . Then, the calculational expressions are as follows:

$$\eta_{SETH} = \eta_{abs} \times \eta_{cu} \quad (1)$$

$$\eta_{abs} = \frac{\int_{E_g}^{\infty} P(h\omega)d(h\omega)}{\int_0^{\infty} P(h\omega)d(h\omega)} \quad (2)$$

$$\eta_{cu} = \frac{\Delta V \int_{E_g}^{\infty} \frac{P(h\omega)}{h\omega} d(h\omega)}{\int_{E_g}^{\infty} P(h\omega)d(h\omega)} \quad (3)$$

$$E = \begin{cases} E_g, (x(\text{H}_2) \geq 0.2, x(\text{O}_2) \geq 0.6) \\ E_g + 0.2 - x(\text{H}_2), (x(\text{H}_2) < 0.2, x(\text{O}_2) \geq 0.6) \\ E_g + 0.6 - x(\text{O}_2), (x(\text{H}_2) \geq 0.2, x(\text{O}_2) < 0.6) \\ E_g + 0.8 - x(\text{H}_2) - x(\text{O}_2), (x(\text{H}_2) < 0.2, x(\text{O}_2) < 0.6) \end{cases} \quad (4)$$

$$\eta = \eta_{SETH} \times \frac{\int_0^\infty P(h\omega)d(h\omega)}{\int_0^\infty P(h\omega)d(h\omega) + \Delta\Phi \int_0^\infty \frac{P(h\omega)}{h\omega}d(h\omega)} \quad (5)$$

Where  $\Delta\Phi$  is the difference between the vacuum energy levels.  $\Delta V$  is the potential difference of 1.23 eV for water splitting, and  $E$  is the energy of photons for water splitting.  $x(\text{H}_2)$  and  $x(\text{O}_2)$  are the over-potentials for HER and OER.

**Table S3** The overpotentials and  $\eta$  for the ZS-I scheme of 1-HfS<sub>2</sub>/SiSe<sup>x</sup>.

| Configuration | $x(\text{H}_2)$ (eV) | $x(\text{O}_2)$ (eV) | $E_g$ (HSE) | $\Delta\Phi$ (eV) | $\eta$ (%) |
|---------------|----------------------|----------------------|-------------|-------------------|------------|
| 4%            | 1.16                 | 1.52                 | 2.40        | 0.13              | 9.51       |
| 3%            | 1.11                 | 1.46                 | 2.41        | 0.04              | 9.42       |
| 2%            | 1.02                 | 1.40                 | 2.38        | 0.06              | 9.84       |
| 1%            | 0.97                 | 1.33                 | 2.39        | 0.16              | 9.62       |
| 0             | 0.91                 | 1.25                 | 2.40        | 0.26              | 9.41       |
| -1%           | 0.90                 | 1.17                 | 2.45        | 0.36              | 8.61       |
| -2%           | 0.84                 | 1.08                 | 2.46        | 0.45              | 8.41       |
| -3%           | 0.79                 | 0.99                 | 2.47        | 0.55              | 8.15       |

**Table S4** The overpotentials and  $\eta$  for the ZS-II scheme of 1-HfS<sub>2</sub>/SiSe<sup>x</sup>.

| Configuration | $x(\text{H}_2)$ (eV) | $x(\text{O}_2)$ (eV) | $E_g$ (HSE) | $\Delta\Phi$ (eV) | $\eta$ (%) |
|---------------|----------------------|----------------------|-------------|-------------------|------------|
| 4%            | 1.03                 | 1.65                 | 2.40        | 0.13              | 9.51       |
| 3%            | 1.08                 | 1.50                 | 2.41        | 0.04              | 9.42       |
| 2%            | 1.08                 | 1.34                 | 2.38        | 0.06              | 9.84       |
| 1%            | 1.13                 | 1.17                 | 2.39        | 0.16              | 9.62       |
| 0             | 1.17                 | 0.99                 | 2.40        | 0.26              | 9.41       |
| -1%           | 1.25                 | 0.81                 | 2.45        | 0.36              | 8.61       |
| -2%           | 1.30                 | 0.63                 | 2.46        | 0.45              | 8.41       |
| -3%           | 1.34                 | 0.44                 | 2.47        | 0.55              | 6.04       |



**Table S5** The overpotentials and  $\eta$  for the ZS-III scheme of 1-HfS<sub>2</sub>/SiSe<sup>x</sup>.

| Configuration | $x(\text{H}_2)$ (eV) | $x(\text{O}_2)$ (eV) | $E_g$ (HSE) | $\Delta\Phi$ (eV) | $\eta$ (%) |
|---------------|----------------------|----------------------|-------------|-------------------|------------|
| 4%            | 1.03                 | 1.52                 | 2.40        | 0.13              | 9.51       |
| 3%            | 1.08                 | 1.46                 | 2.41        | 0.04              | 9.42       |
| 2%            | 1.08                 | 1.40                 | 2.38        | 0.06              | 9.84       |
| 1%            | 1.13                 | 1.33                 | 2.39        | 0.16              | 9.62       |
| 0             | 1.17                 | 1.25                 | 2.40        | 0.26              | 9.41       |
| -1%           | 1.25                 | 1.17                 | 2.45        | 0.36              | 8.61       |
| -2%           | 1.30                 | 1.08                 | 2.46        | 0.45              | 8.41       |
| -3%           | 1.34                 | 0.99                 | 2.47        | 0.55              | 8.15       |

**Table S6** The overpotentials and  $\eta$  for the ZS-IV scheme of 1-HfS<sub>2</sub>/SiSe<sup>x</sup>.

| Configuration | $x(\text{H}_2)$ (eV) | $x(\text{O}_2)$ (eV) | $E_g$ (HSE) | $\Delta\Phi$ (eV) | $\eta$ (%) |
|---------------|----------------------|----------------------|-------------|-------------------|------------|
| 4%            | 1.16                 | 1.65                 | 2.40        | 0.13              | 9.51       |
| 3%            | 1.11                 | 1.50                 | 2.41        | 0.04              | 9.42       |
| 2%            | 1.02                 | 1.34                 | 2.38        | 0.06              | 9.84       |
| 1%            | 0.97                 | 1.17                 | 2.39        | 0.16              | 9.62       |
| 0             | 0.91                 | 0.99                 | 2.40        | 0.26              | 9.41       |
| -1%           | 0.90                 | 0.81                 | 2.45        | 0.36              | 8.61       |
| -2%           | 0.84                 | 0.63                 | 2.46        | 0.45              | 8.41       |
| -3%           | 0.79                 | 0.44                 | 2.47        | 0.55              | 6.04       |

**Table S7** The overpotentials and  $\eta$  for the ZS-I scheme of 2-HfS<sub>2</sub><sup>x</sup>/SiSe<sup>y</sup>.

| Configuration | $x(\text{H}_2)$ (eV) | $x(\text{O}_2)$ (eV) | $E_g$ (HSE) | $\Delta\Phi$ (eV) | $\eta$ (%) |
|---------------|----------------------|----------------------|-------------|-------------------|------------|
| 4%            | 0.90                 | 1.50                 | 2.29        | 0.08              | 11.48      |
| 3%            | 0.86                 | 1.38                 | 2.30        | 0.01              | 11.41      |
| 2%            | 0.82                 | 1.33                 | 2.31        | 0.10              | 11.07      |
| 1%            | 0.78                 | 1.27                 | 2.33        | 0.19              | 10.67      |
| 0             | 0.74                 | 1.19                 | 2.35        | 0.27              | 10.20      |
| -1%           | 0.70                 | 1.11                 | 2.37        | 0.36              | 9.83       |
| -2%           | 0.67                 | 1.02                 | 2.39        | 0.44              | 9.41       |
| -3%           | 0.66                 | 0.92                 | 2.44        | 0.53              | 8.65       |

**Table S8** The overpotentials and  $\eta$  for the ZS-II scheme of 2-HfS<sub>2</sub><sup>x</sup>/SiSe<sup>y</sup>.

| Configuration | $x(\text{H}_2)$ (eV) | $x(\text{O}_2)$ (eV) | $E_g$ (HSE) | $\Delta\Phi$ (eV) | $\eta$ (%) |
|---------------|----------------------|----------------------|-------------|-------------------|------------|
| 4%            | 0.83                 | 1.58                 | 2.29        | 0.08              | 11.48      |
| 3%            | 0.87                 | 1.37                 | 2.30        | 0.01              | 11.41      |
| 2%            | 0.92                 | 1.24                 | 2.31        | 0.10              | 11.07      |
| 1%            | 0.96                 | 1.08                 | 2.33        | 0.19              | 10.67      |
| 0             | 1.01                 | 0.92                 | 2.35        | 0.27              | 10.20      |
| -1%           | 1.06                 | 0.75                 | 2.37        | 0.36              | 9.83       |
| -2%           | 1.11                 | 0.57                 | 2.39        | 0.44              | 8.99       |
| -3%           | 1.19                 | 0.39                 | 2.44        | 0.53              | 5.78       |

**Table S9** The overpotentials and  $\eta$  for the ZS-III scheme of 2-HfS<sub>2</sub><sup>x</sup>/SiSe<sup>y</sup>.

| Configuration | $x(\text{H}_2)(\text{eV})$ | $x(\text{O}_2)(\text{eV})$ | $E_g(\text{HSE})$ | $\Delta\Phi(\text{eV})$ | $\eta(\%)$ |
|---------------|----------------------------|----------------------------|-------------------|-------------------------|------------|
| 4%            | 0.83                       | 1.50                       | 2.29              | 0.08                    | 11.48      |
| 3%            | 0.87                       | 1.38                       | 2.30              | 0.01                    | 11.41      |
| 2%            | 0.92                       | 1.33                       | 2.31              | 0.10                    | 11.07      |
| 1%            | 0.96                       | 1.27                       | 2.33              | 0.19                    | 10.67      |
| 0             | 1.01                       | 1.19                       | 2.35              | 0.27                    | 10.20      |
| -1%           | 1.06                       | 1.11                       | 2.37              | 0.36                    | 9.83       |
| -2%           | 1.11                       | 1.02                       | 2.39              | 0.44                    | 9.41       |
| -3%           | 1.19                       | 0.92                       | 2.44              | 0.53                    | 8.65       |

**Table S10** The overpotentials and  $\eta$  for the ZS-IV scheme of 2-HfS<sub>2</sub><sup>x</sup>/SiSe<sup>y</sup>.

| Configuration | $x(\text{H}_2)(\text{eV})$ | $x(\text{O}_2)(\text{eV})$ | $E_g(\text{HSE})$ | $\Delta\Phi(\text{eV})$ | $\eta(\%)$ |
|---------------|----------------------------|----------------------------|-------------------|-------------------------|------------|
| 4%            | 0.90                       | 1.58                       | 2.29              | 0.08                    | 11.48      |
| 3%            | 0.86                       | 1.37                       | 2.30              | 0.01                    | 11.41      |
| 2%            | 0.82                       | 1.24                       | 2.31              | 0.10                    | 11.07      |
| 1%            | 0.78                       | 1.08                       | 2.33              | 0.19                    | 10.67      |
| 0             | 0.74                       | 0.92                       | 2.35              | 0.27                    | 10.20      |
| -1%           | 0.70                       | 0.75                       | 2.37              | 0.36                    | 9.83       |
| -2%           | 0.67                       | 0.57                       | 2.39              | 0.44                    | 8.99       |
| -3%           | 0.66                       | 0.39                       | 2.44              | 0.53                    | 5.78       |

**Table S11** The overpotentials and  $\eta$  for the ZS-I scheme of 3-HfS<sub>2</sub><sup>x</sup>/SiSe<sup>y</sup>.

| Configuration | $x(\text{H}_2)(\text{eV})$ | $x(\text{O}_2)(\text{eV})$ | $E_g(\text{HSE})$ | $\Delta\Phi(\text{eV})$ | $\eta(\%)$ |
|---------------|----------------------------|----------------------------|-------------------|-------------------------|------------|
| 4%            | 0.91                       | 1.48                       | 2.40              | 0.06                    | 9.56       |
| 3%            | 0.89                       | 1.37                       | 2.42              | 0.01                    | 9.29       |
| 2%            | 0.89                       | 1.29                       | 2.45              | 0.05                    | 8.80       |
| 1%            | 0.83                       | 1.24                       | 2.47              | 0.15                    | 8.37       |
| 0             | 0.81                       | 1.16                       | 2.50              | 0.22                    | 7.89       |
| -1%           | 0.80                       | 1.08                       | 2.55              | 0.29                    | 7.22       |
| -2%           | 0.79                       | 0.98                       | 2.58              | 0.35                    | 6.79       |
| -3%           | 0.77                       | 0.88                       | 2.62              | 0.42                    | 6.28       |

**Table S12** The overpotentials and  $\eta$  for the ZS-II scheme of 3-HfS<sub>2</sub><sup>x</sup>/SiSe<sup>x</sup>.

| Configuration | $x(\text{H}_2)(\text{eV})$ | $x(\text{O}_2)(\text{eV})$ | $E_g(\text{HSE})$ | $\Delta\Phi(\text{eV})$ | $\eta(\%)$ |
|---------------|----------------------------|----------------------------|-------------------|-------------------------|------------|
| 4%            | 0.85                       | 1.54                       | 2.40              | 0.06                    | 9.56       |
| 3%            | 0.89                       | 1.37                       | 2.42              | 0.01                    | 9.29       |
| 2%            | 0.94                       | 1.24                       | 2.45              | 0.05                    | 8.80       |
| 1%            | 0.98                       | 1.10                       | 2.47              | 0.15                    | 8.37       |
| 0             | 1.03                       | 0.95                       | 2.50              | 0.22                    | 7.89       |
| -1%           | 1.09                       | 0.79                       | 2.55              | 0.29                    | 7.22       |
| -2%           | 1.14                       | 0.63                       | 2.58              | 0.35                    | 6.79       |
| -3%           | 1.19                       | 0.46                       | 2.62              | 0.42                    | 4.77       |

**Table S13** The overpotentials and  $\eta$  for the ZS-III scheme of 3-HfS<sub>2</sub><sup>x</sup>/SiSe<sup>x</sup>.

| Configuration | $x(\text{H}_2)(\text{eV})$ | $x(\text{O}_2)(\text{eV})$ | $E_g(\text{HSE})$ | $\Delta\Phi(\text{eV})$ | $\eta(\%)$ |
|---------------|----------------------------|----------------------------|-------------------|-------------------------|------------|
| 4%            | 0.85                       | 1.48                       | 2.40              | 0.06                    | 9.56       |
| 3%            | 0.89                       | 1.37                       | 2.42              | 0.01                    | 9.29       |
| 2%            | 0.94                       | 1.29                       | 2.45              | 0.05                    | 8.80       |
| 1%            | 0.98                       | 1.24                       | 2.47              | 0.15                    | 8.37       |
| 0             | 1.03                       | 1.16                       | 2.50              | 0.22                    | 7.89       |
| -1%           | 1.09                       | 1.08                       | 2.55              | 0.29                    | 7.22       |
| -2%           | 1.14                       | 0.98                       | 2.58              | 0.35                    | 6.79       |
| -3%           | 1.19                       | 0.88                       | 2.62              | 0.42                    | 6.28       |

**Table S14** The overpotentials and  $\eta$  for the ZS-IV scheme of 3-HfS<sub>2</sub><sup>x</sup>/SiSe<sup>x</sup>.

| Configuration | $x(\text{H}_2)(\text{eV})$ | $x(\text{O}_2)(\text{eV})$ | $E_g(\text{HSE})$ | $\Delta\Phi(\text{eV})$ | $\eta(\%)$ |
|---------------|----------------------------|----------------------------|-------------------|-------------------------|------------|
| 4%            | 0.91                       | 1.54                       | 2.40              | 0.06                    | 9.56       |
| 3%            | 0.89                       | 1.37                       | 2.42              | 0.01                    | 9.29       |
| 2%            | 0.89                       | 1.24                       | 2.45              | 0.05                    | 8.80       |
| 1%            | 0.83                       | 1.10                       | 2.47              | 0.15                    | 8.37       |
| 0             | 0.81                       | 0.95                       | 2.50              | 0.22                    | 7.89       |
| -1%           | 0.80                       | 0.79                       | 2.55              | 0.29                    | 7.22       |
| -2%           | 0.79                       | 0.63                       | 2.58              | 0.35                    | 6.79       |
| -3%           | 0.77                       | 0.46                       | 2.62              | 0.42                    | 4.70       |

## References

1. M. Faghihnasiri, A. Ahmadi, S. A. Golpayegan, S. G. Sharifabadi and A. Ramazani, *Nanomaterials*, 2020, **10**.
2. H. C. Lu, Y. Z. Guo and J. Robertson, *Appl. Phys. Lett.*, 2018, **112**.
3. D. Singh and R. Ahuja, *ACS Appl. Energ. Mater.*, 2019, **2**, 6891-6903.
4. M. Salavati, *Front. Struct. Civ. Eng.*, 2019, **13**, 486-494.
5. B. Wang, X. Wang, P. Wang, T. Yang, H. Yuan, G. Wang and H. Chen, *Nanomaterials*, 2019, **9**, 1706.
6. C. Kamal, A. Chakrabarti and M. Ezawa, *Phys. Rev. B*, 2016, **93**, 125428.
7. S. P. Poudel and S. Barraza-Lopez, *Phys. Rev. B*, 2021, **103**, 024107.
8. J. Bardeen and W. Shockley, *Phys. Rev.*, 1950, **80**, 72.
9. C. F. Fu, J. Y. Sun, Q. Q. Luo, X. X. Li, W. Hu and J. L. Yang, *Nano Lett.*, 2018, **18**, 6312-6317.
